# Supplementary material for: Targeting Anaplastic Lymphoma Kinase (ALK) in Rhabdomyosarcoma (RMS) with the Second-Generation ALK Inhibitor Ceritinib
Source: PubMed Central journal article supplement — Target Oncol. 2017 Oct 24;12(6):815–26. doi: 10.1007/s11523-017-0528-z (PMC5700232; doi:10.1007/s11523-017-0528-z), 2017-10-24
Supplement: 11523_2017_528_MOESM1_ESM.pdf [file 11523_2017_528_MOESM1_ESM.pdf]

## **Targeting Anaplastic Lymphoma Kinase (ALK) in Rhabdomyosarcoma (RMS) with the second-generation ALK inhibitor Ceritinib**

*Anke E. M. van Erp<sup>1\*</sup>, Melissa H. S. Hillebrandt-Roeffen<sup>1</sup>, Laurens van Houdt<sup>1</sup>, Emmy D. G. Fleuren<sup>2</sup>, Winette T. A. van der Graaf<sup>1,3</sup>, Yvonne M. H. Versleijen-Jonkers<sup>1</sup>*

<sup>1</sup>Department of Medical Oncology, Radboud University Medical Center, P.O. Box 9101, 6500HB Nijmegen, The Netherlands

<sup>2</sup>The Institute of Cancer Research, Clinical Studies, Clinical and Translational Sarcoma/Gene Function, London SW3 6JB United Kingdom

<sup>3</sup>The Institute of Cancer Research and The Royal Marsden NHS Foundation Trust, London SW7 3RP United Kingdom

### **Corresponding author\* :**

Anke E. M. van Erp

Department of Medical Oncology (internal postal code: 452)

Radboud University Medical Center

P.O. Box 9101

6500 HB Nijmegen, the Netherlands

Phone: 0031-(0)24-3618897

E-mail: [anke.em.vanerp@radboudumc.nl](mailto:anke.em.vanerp@radboudumc.nl)

ORCID: 0000-0002-8694-922X

### **Electronic Supplementary Material**

**Supplementary Table 1.** Clinical trials with ALK inhibitors in solid tumors (including RMS) as of March 2017

| # <sup>a</sup>               | Tumor type                                  | ALK status                                             | RMS (Y/N) <sup>b</sup> | Age            | Inhibitor              | Target                        | Phase     | Status <sup>a</sup> | Preliminary data <sup>c</sup>                                                                                          |
|------------------------------|---------------------------------------------|--------------------------------------------------------|------------------------|----------------|------------------------|-------------------------------|-----------|---------------------|------------------------------------------------------------------------------------------------------------------------|
| <b>NCT01524926</b>           | <b>Solid tumors</b>                         | <b>ALK and/or MET alterations</b>                      | <b>Y</b>               | <b>&gt;1 y</b> | <b>crizotinib</b>      | <b>ALK, MET, ROS1</b>         | <b>II</b> | <b>Recruiting</b>   | Inclusion of metastatic ARMS                                                                                           |
| <b>NCT02034981</b>           | <b>Hematological and solid tumors</b>       | <b>ALK, MET or ROS1 alterations</b>                    | <b>Y</b>               | <b>&gt;1y</b>  | <b>crizotinib</b>      | <b>ALK, MET, ROS1</b>         | <b>II</b> | <b>Recruiting</b>   | Ten RMS included, no amplification or translocation of ALK, no treatment response reported                             |
| <b>NCT01742286</b>           | <b>Pediatric malignancies</b>               | <b>ALK alteration or ALK<sup>+</sup> IHC (for RMS)</b> | <b>Y</b>               | <b>1-17y</b>   | <b>ceritinib</b>       | <b>ALK, IGF1R, IR</b>         | <b>I</b>  | <b>Recruiting</b>   | Six RMS included, no treatment response reported                                                                       |
| NCT02465528                  | All except ALK-positive lung cancer         | ALK positive                                           | N                      | >1y            | ceritinib              | ALK, IGF1R, IR                | II        | Recruiting          |                                                                                                                        |
| NCT02186821                  | Hematological and solid tumors              | ALK or ROS alterations                                 | N                      | >18y           | ceritinib              | ALK, IGF1R, IR                | II        | Recruiting          |                                                                                                                        |
| NCT02321501                  | Locally advanced/metastatic solid tumors    | N.S.                                                   | N                      | >18y           | ceritinib + everolimus | ALK, IGF1R, ROS1 + mTOR       | I         | Recruiting          |                                                                                                                        |
| NCT02227940                  | Gemcitabine-based treated solid tumors      | N.S.                                                   | N                      | >18y           | ceritinib + chemo      | ALK, IGF1R, IR                | I         | Recruiting          |                                                                                                                        |
| NCT00939770 <sup>[1]</sup>   | Relapse or refractory solid tumors and ALCL | ALK fusion, mutation or amplification (>4-fold)        | N                      | 1-21           | crizotinib             | ALK, MET, ROS1                | I/II      | Active              | Three RMS included in dose-escalating phase, not eligible for treatment response analysis due to lack ALK alterations. |
| NCT02693535                  | Multiple, incl. advanced solid tumors       | ALK, ROS1, MET mutations                               | N                      | >18y           | crizotinib             | ALK, MET, ROS1                | II        | Recruiting          |                                                                                                                        |
| NCT02465060                  | Solid tumor or lymphoma                     | ALK translocation                                      | N                      | >18y           | crizotinib             | ALK, MET, ROS1                | II        | Recruiting          |                                                                                                                        |
| NCT01606878                  | Relapsed or refractory solid tumors or ALCL | N.S.                                                   | N                      | 1-21           | crizotinib + chemo     | ALK, MET, ROS1                | I         | Recruiting          |                                                                                                                        |
| NCT01999972                  | Solid tumor                                 | N.S.                                                   | N                      | >18y           | crizotinib + axitinib  | ALK, MET, ROS1 + multi kinase | I         | Recruiting          |                                                                                                                        |
| NCT02650401                  | Solid tumors, CNS tumors and NB             | N.S.                                                   | N                      | 2-22y          | entrectinib            | TrkA/B/C, ROS1, ALK           | I         | Recruiting          |                                                                                                                        |
| NCT02568267                  | Solid tumors incl. sarcomas                 | NTRK1/2/3, ROS1 or ALK gene rearrangement              | N                      | >18y           | entrectinib            | TrkA/B/C, ROS1, ALK           | II        | Recruiting          |                                                                                                                        |
| NCT02097810 <sup>[2,3]</sup> | Locally advanced or metastatic solid tumors | ALK, ROS1, NTRK1/2/3 alterations                       | N                      | >18y           | RXDX-101               | ALK, ROS1, TrkA/B/C           | I         | Recruiting          |                                                                                                                        |
| NCT01625234                  | Advanced solid tumors                       | N.S.                                                   | N                      | >18y           | X-396                  | ALK                           | I         | Recruiting          |                                                                                                                        |
| NCT02048488                  | Advanced solid tumors and lymphomas         | ALK or TRK-positive status                             | N                      | >18y           | TSR-011                | ALK, TRK                      | I/II      | Active              |                                                                                                                        |
| NCT01401504                  | Relapse or refractory solid tumor           | N.S.                                                   | N                      | >20y           | ASP3026                | ALK, ROS1, ACK                | I         | Completed           |                                                                                                                        |
| NCT01284192 <sup>[4]</sup>   | Advanced solid tumors and BCL               | ALK or ROS alterations                                 | N                      | >18y           | ASP3026                | ALK, ROS1, ACK                | I         | Completed           |                                                                                                                        |

<sup>a</sup> according to *Clinicaltrials.gov* (as of 29-3-2017), RMS: rhabdomyosarcoma, <sup>b</sup> mentioning of inclusion RMS patients, <sup>c</sup> up to April 2017, Y: inclusion RMS patients, N: not mentioned, y: years of age, N.S.: not specified, ARMS: alveolar rhabdomyosarcoma, ALCL: anaplastic large cell lymphoma, CNS: central nervous system, NB: neuroblastoma, BCL: B-cell lymphoma, ALK: anaplastic lymphoma kinase, IGF1R: insulin-like growth factor 1 receptor, IR: insulin receptor

## 2. Supplementary materials and methods

### 2.6 Western Blot

Monoclonal rabbit anti-phosphorylated (p) AKT (Ser473) (1:1000, cat.#4060S), anti-pERK (Thr202/Tyr204) (1:500, cat.#4376S), anti-pS6 (S6 ribosomal protein) (Ser235/236) (1:1000, cat.#2211S), anti-pALK (Tyr1507) (1:1000, cat.#14678S), anti-pIGF1R (Tyr1135/1136) (1:500, cat.#3024S), anti-pSrc (Tyr416) (1:1000, cat.#2101S), anti-ALK (1:1000, cat.#3633S), anti-IGF1R (1:500, cat.#3027S) and anti-poly ADP ribose polymerase (PARP, 1:2000; cat.#9542) were purchased from Cell Signaling Technology (Danvers, MA, USA). Loading control monoclonal mouse anti- $\alpha$ -tubulin (1:1000, cat.#A11126) or anti-GAPDH (1:10000, cat.#Ab8245) were purchased from Thermo Scientific (Breda, The Netherlands) or Abcam (Cambridge, UK), respectively.

### 2.9 Immunohistochemistry (IHC)

IHC of tumor xenografts was performed to evaluate general tumor characteristics (vascularization, CD34; proliferation, Ki67; and apoptosis, Caspase-3) as previously described [5]. Effects on the PI3K/Akt and MEK/ERK pathways (pAkt and pERK1/2) were assessed with antibodies directed against pAkt (Ser473) and pERK (Thr202/Tyr204). Tumor sections (4 $\mu$ m) were deparaffinized in xylol and rehydrated in a graded ethanol into water series. Antigen retrieval was performed by heating the slides for 10 min at 100°C while in 10mM citrate buffer, pH 6. Endogenous peroxidase activity was blocked in 3% H<sub>2</sub>O<sub>2</sub> for 10 min at RT. Non-specific binding was blocked with 20% normal goat serum in TBS for 30 min. Sections were incubated overnight at 4°C with the anti-pAkt (1:50, cat.#4060S) or anti-pERK (1:100, cat.#4376S) antibody (Cell Signaling Technology, Danvers, MA, USA), followed by a 30 min incubation at RT with goat-anti-rabbit biotinylated secondary antibody (1:200, Vector laboratories, Peterborough, UK). Lastly, avidin-biotin-enzyme complex (1:100, Vector Laboratories) was added for 30 min at RT followed by 7 min incubation with 3,3'-diaminobenzidine (Bright-DAB) for visualization of antigen expression. Slides were counterstained with hematoxylin, dehydrated, and mounted followed by expression analysis.

Ki67, CD34 and Caspase-3 slides were digitally analyzed with the KS400-Axiophot light microscope (Carl Zeiss, Jena, Germany) and expression was quantitatively analyzed by KS400 software (Carl Zeiss). Random selection of fifteen (CD34; Caspase-3) or six (Ki67) non-overlapping fields was performed and examined at a 200x magnification. The number of blood vessel (CD34) and the percentage of positive cells as proportion of all counted cells (Ki67; Caspase-3) was determined and used for further analysis. Expression of pAkt and pERK was semi-quantitatively scored according to the following distinctions: no positive cells (0), low (1), medium (2) or high (3) staining intensity in >10% of the tumor. Digital images of hematoxylin and eosin (H&E) stained slides at 40x magnification (VisionTek™, Sakura, version 2.6, East Dundee, IL, USA) were used to determine mitotic activity in ten non-overlapping fields. Mean scores were used to compare the treatment groups. Differences were determined with an unpaired Student's t-test in GraphPad Prism Version 5.03 Software.  $p < 0.05$  were considered significant.

### 3. Supplementary figures

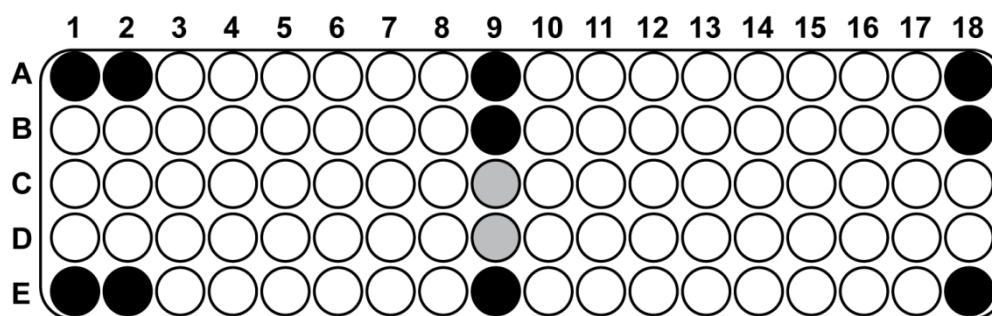

| Position | Protein              | Phosphorylation site |
|----------|----------------------|----------------------|
| A1-2     | Positive control     | -                    |
| A3-4     | FGFR1                | pan-Tyr              |
| A5-6     | TrkA/NTRK1           | pan-Tyr              |
| A7-8     | ALK                  | pan-Tyr              |
| A9       | Positive control     | -                    |
| A10-11   | EphA1                | pan-Tyr              |
| A12-13   | EphB4                | pan-Tyr              |
| A14-15   | Akt/PKB/Rasc         | Thr308               |
| A16-17   | IRS-1                | pan-Tyr              |
| A18      | Positive control     | -                    |
| B1-2     | EGFR/ErbB1           | pan-Tyr              |
| B3-4     | FGFR3                | pan-Tyr              |
| B5-6     | TrkB/NTRK2           | pan-Tyr              |
| B7-8     | PDGFR                | pan-Tyr              |
| B9       | Positive control     | -                    |
| B10-11   | EphA2                | pan-Tyr              |
| B12-13   | Tyro-3/Dtk           | pan-Tyr              |
| B14-15   | Akt/PKB/Rasc         | Ser473               |
| B16-17   | Zap-70               | pan-Tyr              |
| B18      | Positive control     | -                    |
| C1-2     | Her2/ErbB2           | pan-Tyr              |
| C3-4     | FGFR4                | pan-Tyr              |
| C5-6     | Met/HGFR             | pan-Tyr              |
| C7-8     | cKit/SCFR            | pan-Tyr              |
| C9       | Negative control     | -                    |
| C10-11   | EphA3                | pan-Tyr              |
| C12-13   | Axl                  | pan-Tyr              |
| C14-15   | p44/42 MAPK (ERK1/2) | Thr202/Tyr204        |
| C16-17   | Src                  | pan-Tyr              |
| C18      | STAT3                | Tyr705               |
| D1-2     | Her3/ErbB3           | pan-Tyr              |
| D3-4     | InsR                 | pan-Tyr              |
| D5-6     | Ron/MST1R            | pan-Tyr              |
| D7-8     | FLT3/Flk2            | pan-Tyr              |
| D9       | Negative control     | -                    |
| D10-11   | EphB1                | pan-Tyr              |
| D12-13   | Tie2/TEK             | pan-Tyr              |
| D14-15   | S6 ribosomal protein | Ser235/236           |
| D16-17   | Lck                  | Pan-Tyr              |

|        |                  |         |
|--------|------------------|---------|
| D18    | STAT3            | Tyr705  |
| E1-2   | Positive control | -       |
| E3-4   | IGF1R            | pan-Tyr |
| E5-6   | Ret              | pan-Tyr |
| E7-8   | M-CSFR/CSF-1R    | pan-Tyr |
| E9     | Positive control | -       |
| E10-11 | EphB3            | pan-Tyr |
| E12-13 | VEGFR2/KDR       | pan-Tyr |
| E14-15 | c-Abl            | Thr308  |
| E16-17 | IRS-1            | pan-Tyr |
| E18    | Positive control | -       |

---

**Supplementary Figure 1.** An overview of all the targets present in the PathScan analysis and their location on the array.

|                        | Rh30       |           | Rh41       |            | RD        |           | Rh18       |            |
|------------------------|------------|-----------|------------|------------|-----------|-----------|------------|------------|
|                        | -          | +         | -          | +          | -         | +         | -          | +          |
| <i>ceritinib</i>       |            |           |            |            |           |           |            |            |
| ALK                    | 2          | 2         | 2          | 1          | 1         | 2         | 0          | 0          |
| Axl                    | 2          | 2         | 2          | 3          | 0         | 1         | 1          | 1          |
| c-Kit/SCFR             | 7          | 7         | 8          | 7          | 6         | 7         | 1          | 1          |
| EGFR/ErbB1             | 5          | 3         | 5          | 4          | 2         | 4         | 1          | 1          |
| EphA1                  | 14         | 12        | 20         | 12         | 16        | 13        | 1          | 2          |
| EphA2                  | 6          | 5         | 10         | 6          | 5         | 6         | 2          | 2          |
| EphA3                  | 7          | 6         | 8          | 6          | 3         | 6         | 2          | 3          |
| EphB1                  | 5          | 4         | 4          | 3          | 1         | 3         | 1          | 1          |
| EphB3                  | 1          | 2         | 3          | 1          | 0         | 2         | 0          | 1          |
| EphB4                  | 3          | 3         | 10         | 7          | 1         | 2         | 3          | 4          |
| FGFR1                  | 9          | 8         | 9          | 8          | 8         | 8         | 3          | 3          |
| FGFR3                  | 17         | 12        | 13         | 10         | 12        | 11        | 5          | 5          |
| FGFR4                  | 12         | 10        | 32         | 13         | 7         | 8         | 3          | 3          |
| FLT3/Fik2              | 4          | 2         | 6          | 4          | 3         | 2         | 2          | 2          |
| Her2/ErbB2             | 7          | 5         | 9          | 6          | 4         | 6         | 2          | 2          |
| Her3/ErbB3             | 4          | 3         | 8          | 5          | 3         | 9         | 3          | 3          |
| IGF1R                  | 2          | 0         | 17         | 2          | 11        | 2         | 2          | 0          |
| InsR                   | 4          | 3         | 5          | 4          | 2         | 4         | 1          | 1          |
| M-CSFR/CSF-1R          | 1          | 1         | 2          | 1          | 1         | 1         | 1          | 1          |
| Met/HGFR               | 9          | 9         | 19         | 8          | 3         | 5         | 1          | 1          |
| PDGFR                  | 4          | 5         | 6          | 5          | 3         | 4         | 1          | 1          |
| Ret                    | 12         | 9         | 12         | 9          | 10        | 8         | 3          | 2          |
| Ron/MST1R              | 7          | 6         | 9          | 7          | 6         | 7         | 2          | 2          |
| Tie2/TEK               | 3          | 3         | 5          | 5          | 1         | 3         | 2          | 3          |
| TrkA/NTRK1             | 3          | 3         | 4          | 3          | 2         | 3         | 1          | 1          |
| TrkB/NTRK2             | 13         | 11        | 13         | 11         | 11        | 11        | 2          | 2          |
| Tyro-3/Dtk             | 10         | 8         | 13         | 11         | 8         | 8         | 1          | 1          |
| VEGFR2/KDR             | 1          | 1         | 1          | 2          | 0         | 1         | 1          | 2          |
| <b>Akt (Ser473)</b>    | <b>179</b> | <b>61</b> | <b>124</b> | <b>60</b>  | <b>87</b> | <b>61</b> | <b>41</b>  | <b>14</b>  |
| Akt (Thr308)           | 35         | 25        | 37         | 33         | 24        | 30        | 15         | 15         |
| c-Abl (pan-Tyr)        | 4          | 4         | 6          | 4          | 2         | 7         | 1          | 1          |
| IRS-1 (pan-Tyr)        | 12         | 15        | 18         | 16         | 22        | 43        | 9          | 13         |
| Lck (pan-Tyr)          | 4          | 3         | 4          | 3          | 2         | 5         | 0          | 1          |
| Erk1/2 (Thr202/204)    | 9          | 8         | 12         | 11         | 10        | 15        | 11         | 19         |
| <b>S6 (Ser235/236)</b> | <b>80</b>  | <b>25</b> | <b>37</b>  | <b>23</b>  | <b>69</b> | <b>47</b> | <b>132</b> | <b>157</b> |
| <b>Src (pan-Tyr)</b>   | <b>34</b>  | <b>40</b> | <b>301</b> | <b>190</b> | <b>46</b> | <b>74</b> | <b>79</b>  | <b>82</b>  |
| STAT1 (Tyr701)         | 10         | 10        | 9          | 7          | 6         | 11        | 4          | 5          |
| STAT3 (Tyr705)         | 20         | 21        | 8          | 5          | 9         | 17        | 5          | 6          |
| Zap-70 (pan-Tyr)       | 10         | 12        | 13         | 13         | 8         | 11        | 2          | 2          |

**Supplementary Figure 2.** Effects of ceritinib treatment on relative RTK/signaling protein phosphorylation in ARMS and ERMS cell lines. Relative phosphorylation values of the PathScan-examined RTKs and signaling proteins for each cell line before and after ceritinib treatment. Boxes represent the RTKs/signaling proteins that were further examined.

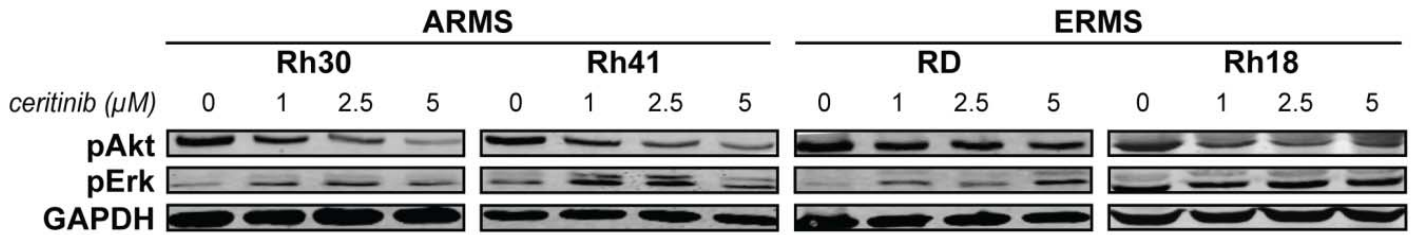

**Supplementary Figure 3.** Effect of 24h ceritinib treatment on PI3K/Akt and MEK/Erk signaling pathway activity. In order to determine the mechanism of action of ceritinib in RMS cells, the concentration that had an effect on intracellular signaling following 24h treatment was determined. Cells were treated with a range of ceritinib concentrations (0-5μM) for 24h and the activity of the two main intracellular signaling pathways: PI3K/Akt (pAkt; 60kDa) and MEK/ERK (pERK; 44-42kDa), was assessed.

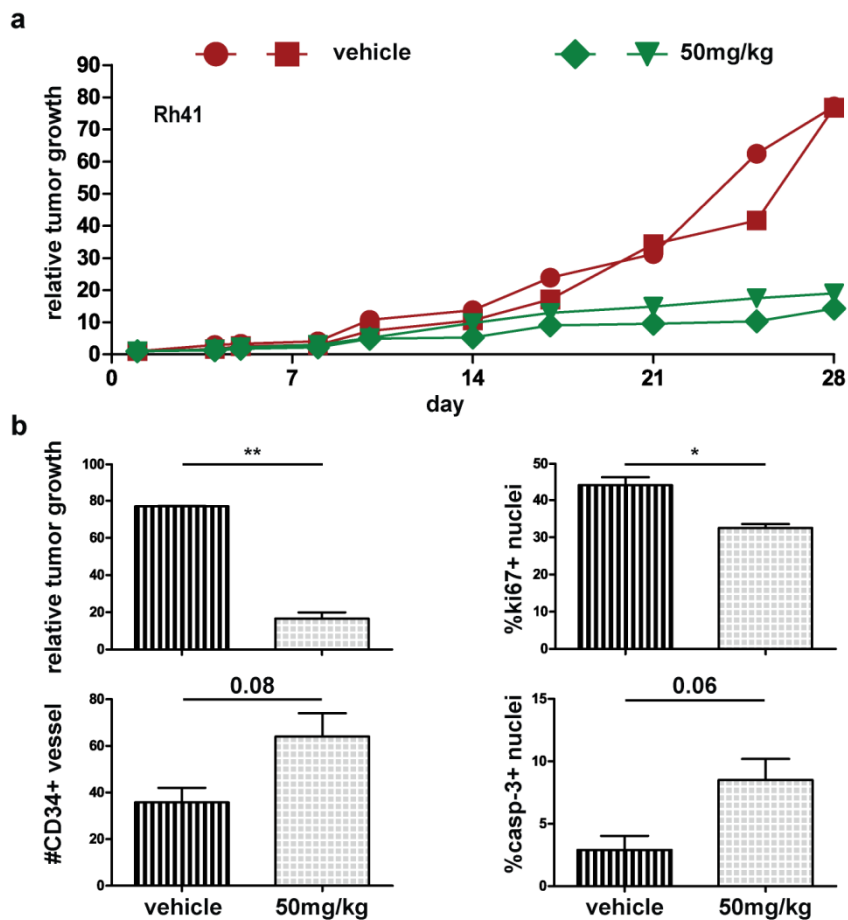

**Supplementary Figure 4.** Treatment effects on ARMS tumor growth –outliers. **a** Relative tumor volume of the outliers of the control and 50 mg/kg treatment groups (n=2 per group) (relative growth  $77.0 \pm 0.3$  vs.  $16.6 \pm 3.3$ ,  $p < 0.01$ ). **b** Graphic representation of the relative tumor volume for the vehicle and ceritinib (25 or 50 mg/kg) groups. Quantitative scoring of Ki67, CD34, and Caspase-3 levels for the outliers. Values are presented as mean  $\pm$  SD, \* $p < 0.05$ , \*\* $p < 0.01$

#### 4. Supplementary References

1. Mosse YP, Lim MS, Voss SD, Wilner K, Ruffner K, Laliberte J et al. Safety and activity of crizotinib for paediatric patients with refractory solid tumours or anaplastic large-cell lymphoma: a Children's Oncology Group phase 1 consortium study. *Lancet Oncol.* 2013;14(6):472-80..
2. Drilon A, Li G, Dogan S, Gounder M, Shen R, Arcila M et al. What hides behind the MASC: clinical response and acquired resistance to entrectinib after ETV6-NTRK3 identification in a mammary analogue secretory carcinoma (MASC). *Ann Oncol.* 2016;27(5):920-6.
3. Farago AF, Le LP, Zheng Z, Muzikansky A, Drilon A, Patel M et al. Durable Clinical Response to Entrectinib in NTRK1-Rearranged Non-Small Cell Lung Cancer. *J Thorac Oncol.* 2015;10(12):1670-4.
4. Li T, LoRusso P, Maitland ML, Ou SH, Bahceci E, Ball HA et al. First-in-human, open-label dose-escalation and dose-expansion study of the safety, pharmacokinetics, and antitumor effects of an oral ALK inhibitor ASP3026 in patients with advanced solid tumors. *Journal of hematology & oncology.* 2016;9:23.
5. Fleuren ED, Versleijen-Jonkers YM, Roeffen MH, Franssen GM, Flucke UE, Houghton PJ et al. Temozolomide combined with cisplatin or bevacizumab is active in osteosarcoma models. *International journal of cancer.* 2014;135(12):2770-82.
